# Supplementary material for: Development of an inventory of goals using the International Classification of Functioning, Disability and Health in a population of non-ambulatory children and adolescents with cerebral palsy treated with botulinum toxin A
Source: Springer Nature journal article supplement (doi:10.1186/s12887-017-0974-x), 2018-01-04
Supplement: MOESM1 [file 15344826]

**Participant's GMFCS Level:** \_\_\_\_\_

## Inventory List of Goals

| <b>Body Structure /<br/>Function</b>                                                                                                                                                                                                                                                                                                                                                                                                                                                                                                                                                                                        | <b>Activity</b>                                                                                                                                                                                                                                                                                                                                                                                                                                                                                                                                                                                                                                                                                                                                                                                                       | <b>Participation</b>                                                                                                                                                                                                                                                                                                                      |
|-----------------------------------------------------------------------------------------------------------------------------------------------------------------------------------------------------------------------------------------------------------------------------------------------------------------------------------------------------------------------------------------------------------------------------------------------------------------------------------------------------------------------------------------------------------------------------------------------------------------------------|-----------------------------------------------------------------------------------------------------------------------------------------------------------------------------------------------------------------------------------------------------------------------------------------------------------------------------------------------------------------------------------------------------------------------------------------------------------------------------------------------------------------------------------------------------------------------------------------------------------------------------------------------------------------------------------------------------------------------------------------------------------------------------------------------------------------------|-------------------------------------------------------------------------------------------------------------------------------------------------------------------------------------------------------------------------------------------------------------------------------------------------------------------------------------------|
| <input type="checkbox"/> Tone<br><br><b>Range of Motion</b><br><input type="checkbox"/> Legs <ul style="list-style-type: none"> <li><input type="checkbox"/> Hip</li> <li><input type="checkbox"/> Knees</li> <li><input type="checkbox"/> Ankles</li> </ul> <input type="checkbox"/> Arms <ul style="list-style-type: none"> <li><input type="checkbox"/> Shoulder</li> <li><input type="checkbox"/> Elbow</li> <li><input type="checkbox"/> Wrist</li> <li><input type="checkbox"/> Fingers</li> </ul> <input type="checkbox"/> Drooling<br><br><input type="checkbox"/> Pain<br><br><input type="checkbox"/> Bone Health | <input type="checkbox"/> Mobility <ul style="list-style-type: none"> <li><input type="checkbox"/> Walking</li> <li><input type="checkbox"/> Standing</li> <li><input type="checkbox"/> Transfers</li> </ul> <input type="checkbox"/> Dressing <ul style="list-style-type: none"> <li><input type="checkbox"/> Shoes and socks</li> <li><input type="checkbox"/> Time taken for dressing</li> </ul> <input type="checkbox"/> Eating<br><br><input type="checkbox"/> Hygiene <ul style="list-style-type: none"> <li><input type="checkbox"/> By patient</li> <li><input type="checkbox"/> By care provider</li> </ul> <input type="checkbox"/> Exercise tolerance<br><br><input type="checkbox"/> Manipulating switches<br><br><input type="checkbox"/> Hand function<br><br><input type="checkbox"/> Tolerating Braces | <input type="checkbox"/> Use of equipment <ul style="list-style-type: none"> <li><input type="checkbox"/> Walker</li> <li><input type="checkbox"/> Wheelchair</li> </ul> <input type="checkbox"/> Being able to participate and compete <ul style="list-style-type: none"> <li><input type="checkbox"/> e.g. wheelchair sports</li> </ul> |
